# Supplementary material for: Synthesis and characterization of methylammonium phosphates as crystalline approximants for anhydrous, low melting phosphate glasses
Source: Royal Society of Chemistry journal article supplement (doi:10.1039/c8ra07736c), 2019-01-01
Supplement: c8ra07736c1.pdf [file c8ra07736c1.pdf]

## Supporting Information

Martin Mangstl,<sup>[a]</sup> Jan Konrad Wied,<sup>[a]</sup> Johannes Weber,<sup>[a]</sup> Christian Pritzel,<sup>[b]</sup>

Reinhard Trettin<sup>[b]</sup> and Jörn Schmedt auf der Günne\*<sup>[a]</sup>

### Carbon monoxide detection:

The reaction of P<sub>4</sub>O<sub>10</sub> and N-methylformamide was carried out for 24 h at 45 °C within a closed Schlenk flask. Afterwards, the generated gas was detected with an electrochemical detector (Figaro TGS5042), which meets EN50191 requirements.

**Table S1.** Best 10 scores for indexing using a LeBail extraction with a least-squares optimization within the FOX program.

| Score | <i>a</i> | <i>b</i> | <i>c</i> | <i>α</i> | <i>β</i> | <i>γ</i> |
|-------|----------|----------|----------|----------|----------|----------|
| 18.9  | 13.2145  | 7.88568  | 4.65417  | 91.0995  | 87.8988  | 106.557  |
| 15.2  | 13.504   | 8.01009  | 7.73902  | 100.328  | 102.064  | 103.652  |
| 14.9  | 13.3206  | 9.22618  | 9.08799  | 118.936  | 73.6459  | 104.48   |
| 14.6  | 7.88087  | 6.65105  | 4.65183  | 91.4389  | 91.0045  | 108.042  |
| 14.5  | 13.0615  | 8.31856  | 8.31356  | 105.348  | 74.8388  | 94.6982  |
| 13.1  | 13.2337  | 7.89056  | 4.6815   | 92.8186  | 93.58    | 106.314  |
| 11.7  | 13.2463  | 7.9111   | 4.68491  | 92.8001  | 93.5532  | 106.37   |
| 11.6  | 13.1995  | 7.87323  | 4.65142  | 91.201   | 87.9078  | 106.574  |
| 11.5  | 13.2085  | 7.87525  | 4.65142  | 91.3966  | 92.2543  | 106.454  |
| 11.4  | 13.2357  | 9.33738  | 4.65142  | 118.537  | 74.0653  | 102.168  |

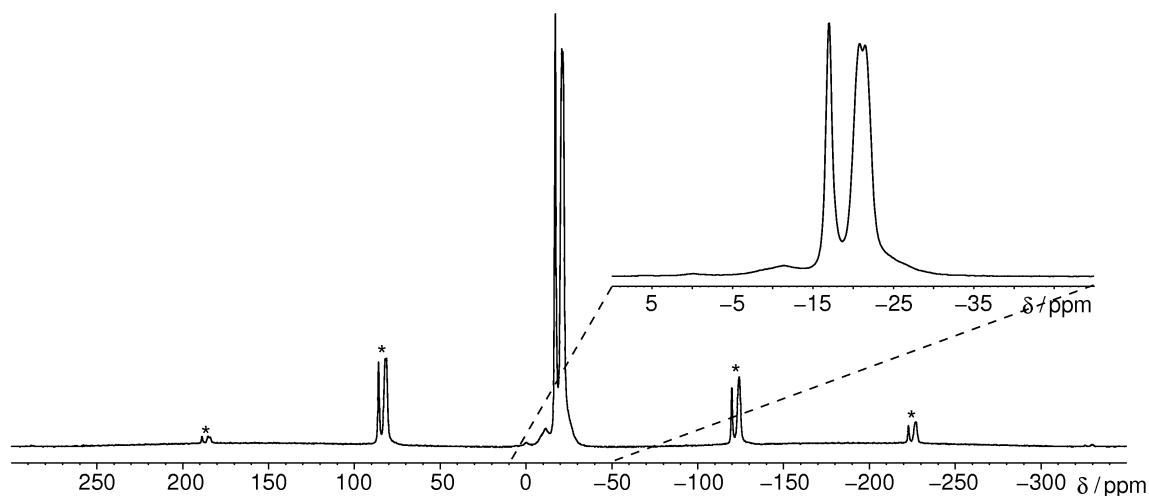

**Figure S1.** Quantitative  $^{31}\text{P}$  MAS NMR spectrum of trimethylammonium cyclotriphosphate obtained at a sample spinning frequency of 12.5 kHz. The spectrum shows three signals corresponding to three different crystallographic orbits of phosphorus atoms within the molecule which appear at  $-17.1$ ,  $-20.7$  and  $-21.7$  ppm. The signals at 0 and  $-11.3$  ppm are negligible due to its very low intensities and the higher half width full maximum which indicates an amorphous side-phase. The spectrum includes all rotational side-bands signed with an asterisk.

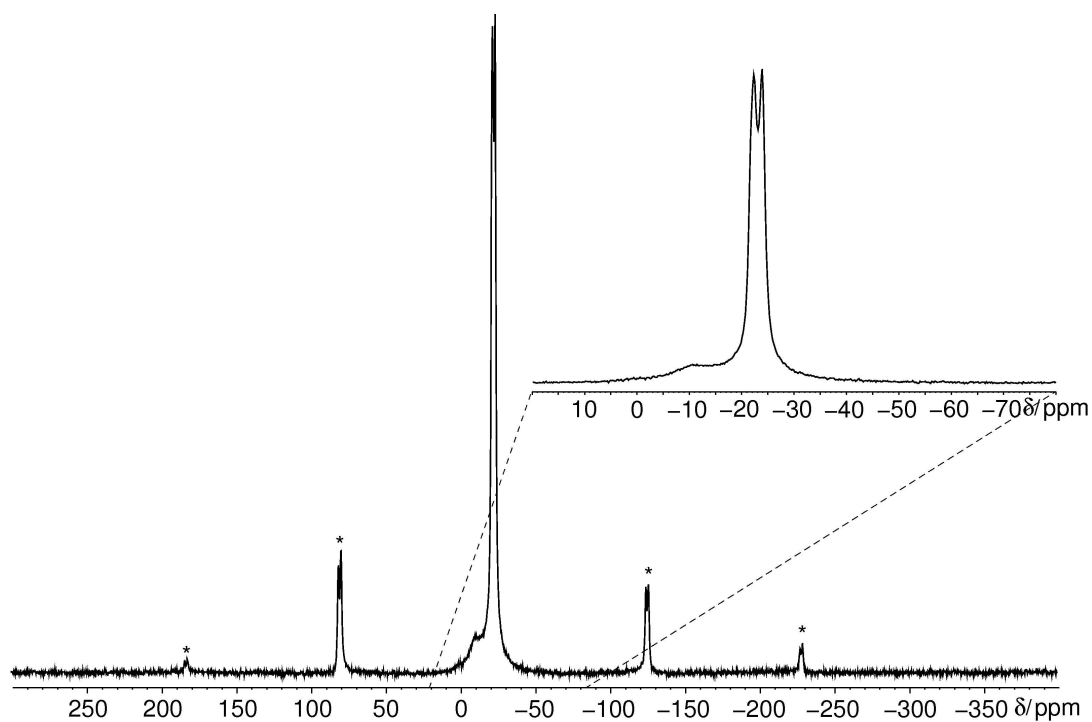

**Figure S2.** Quantitative  $^{31}\text{P}$  MAS NMR spectrum of methylammonium catena-polyphosphate obtained at a sample spinning frequency of 12.5 kHz. The spectrum shows three signals corresponding to three different crystallographic orbits of phosphorus atoms. The main signals appear at  $-22.2$  and  $-23.8$  ppm. A small amount of an amorphous side-phase causes a signal (higher full width half maximum) at  $-16.0$  ppm. The spectrum includes all rotational side-bands signed with an asterisk.

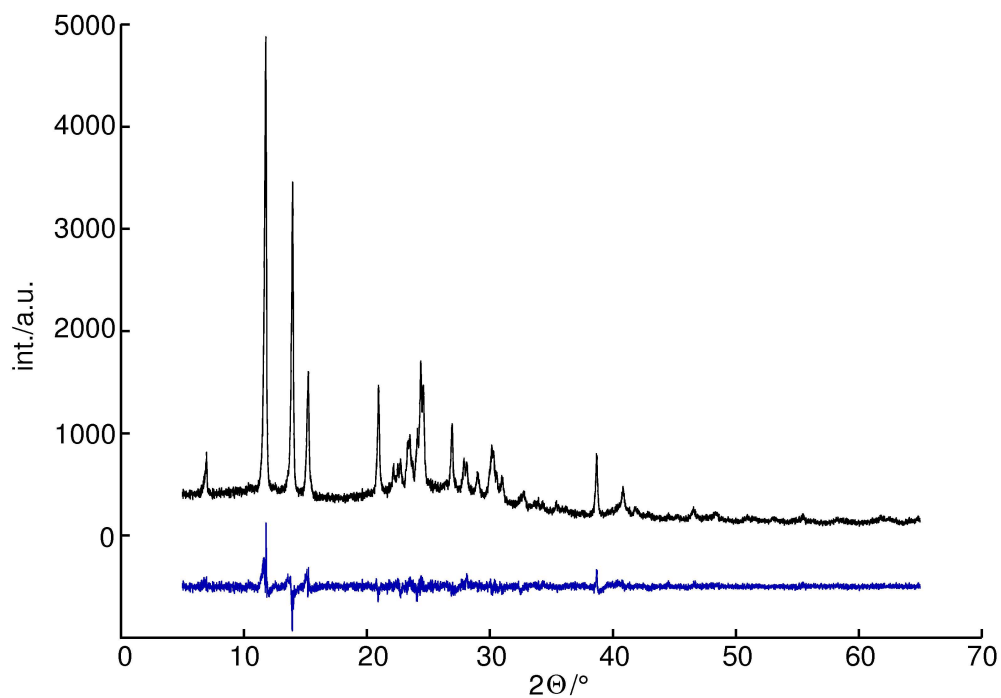

**Figure S3.** Calculated ( $5 \times 5 \times 5$   $k$ -points, PBE/VdW-DF) powder diffraction pattern (black line) of methylammonium catenapolyphosphate, as well as the difference profile (blue line) of the measured (Figure 1) and calculated diffraction pattern ( $\chi^2 = 1.323$ ,  $R_p = 0.054$ ).

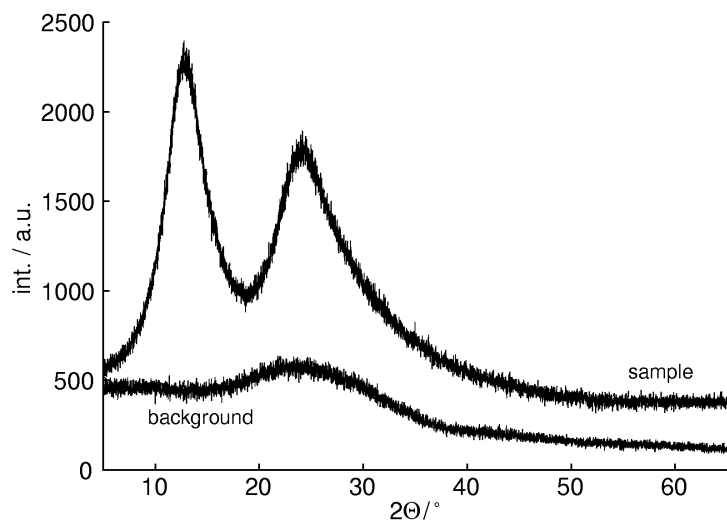

**Figure S4.** Observed powder diffraction pattern of methylammonium phosphate glass measured with  $\text{CuK}\alpha_1$  radiation (top), as well as the background of the capillary (bottom).

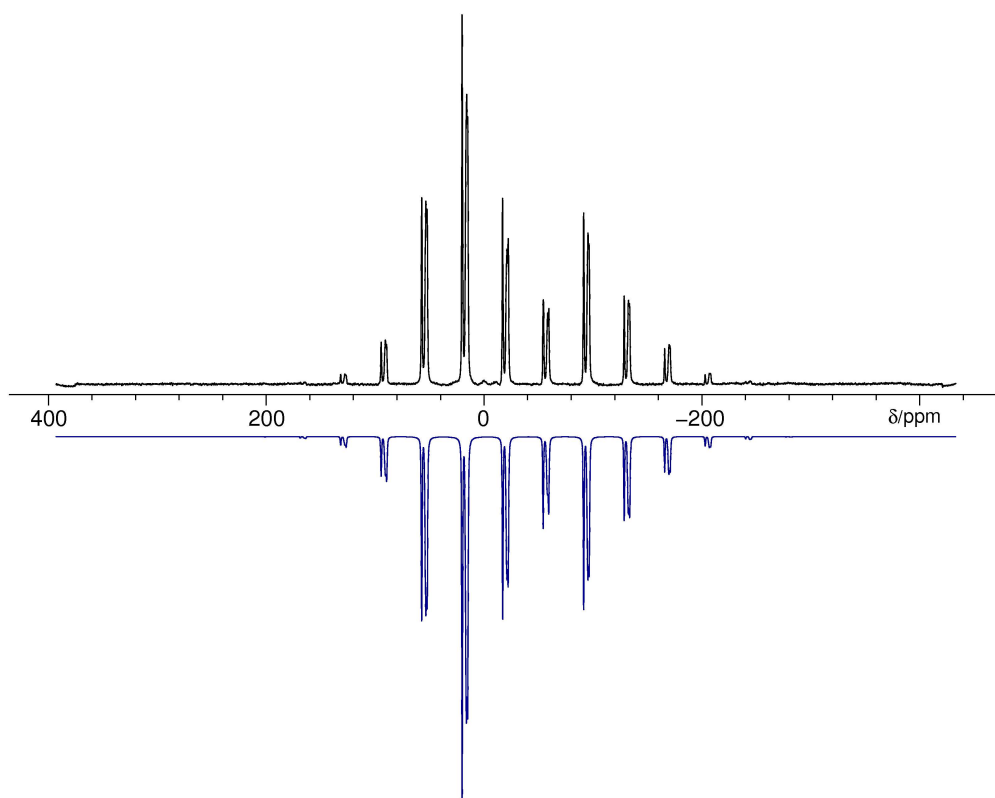

**Figure S5.** Experimental (black line) and simulated (blue line)  $^{31}\text{P}$  MAS NMR spectrum of trimethylammonium cyclotriphosphate obtained at a sample spinning frequency of 5 kHz.

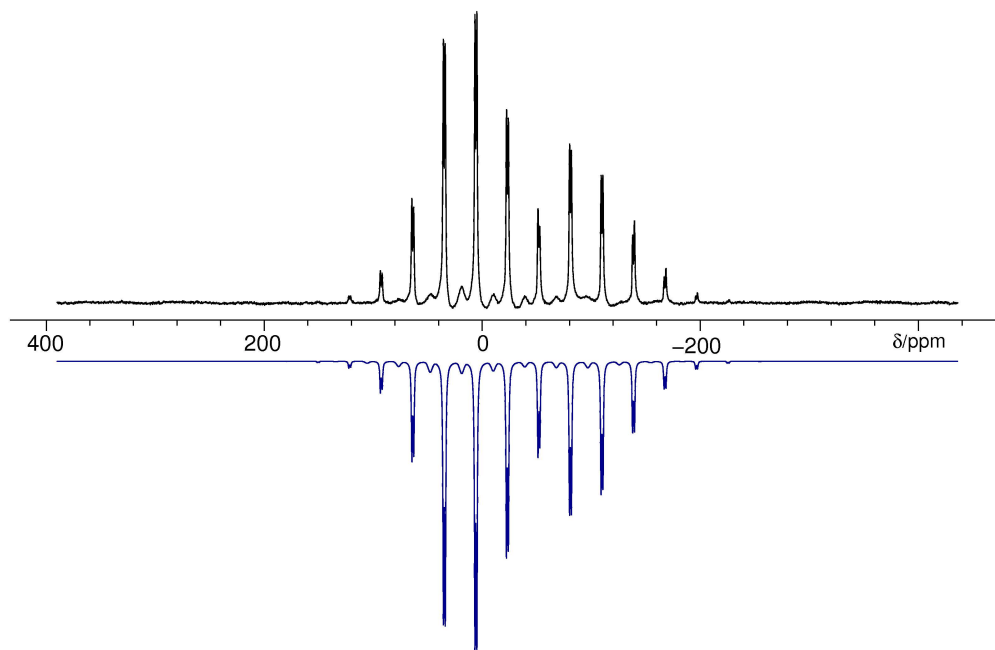

**Figure S6.** Experimental (black line) and simulated (blue line)  $^{31}\text{P}$  MAS NMR spectrum of methylammonium catenapolyphosphate obtained at a sample spinning frequency of 3.5 kHz.

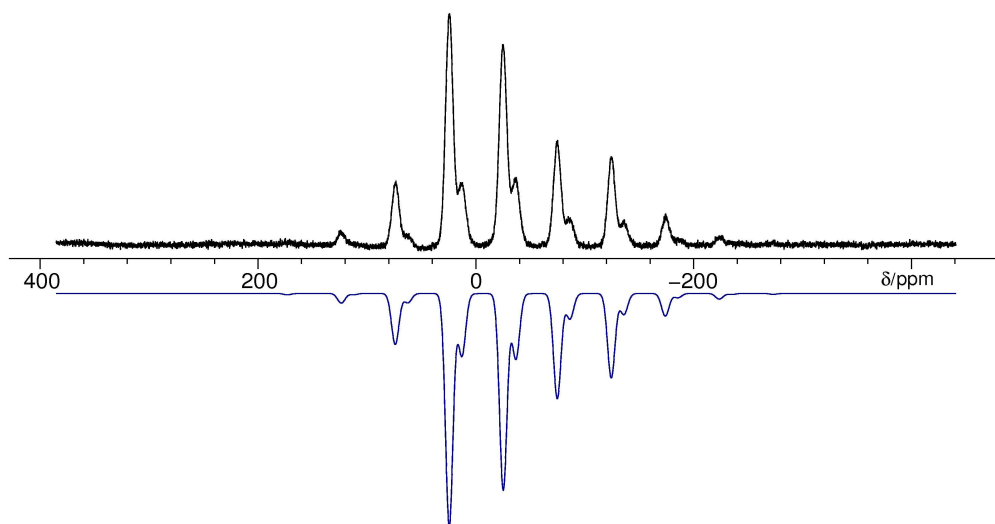

**Figure S7.** Experimental (black line) and simulated (blue line)  $^{31}\text{P}$  MAS NMR spectrum of methylammonium phosphate glass obtained at a sample spinning frequency of 6 kHz.

**Table S2.** Fractional coordinates of the atoms in the unit cell of methylammoniumcatenapolyphosphate by Rietvelt refinement in comparison with the calculated one (5x5x5 *k*-points, PBE/VdW-DF).

| Atom | $x_{\text{exp}}$ | $y_{\text{exp}}$ | $z_{\text{exp}}$ | $x_{\text{calc}}$ | $y_{\text{calc}}$ | $z_{\text{calc}}$ |
|------|------------------|------------------|------------------|-------------------|-------------------|-------------------|
| P1   | 0.76743(39)      | 0.17049(62)      | 0.7665(12)       | 0.77519           | 0.15756           | 0.78002           |
| P2   | 0.74326(40)      | 0.37623(67)      | 0.2814(12)       | 0.74190           | 0.36797           | 0.29139           |
| O1   | 0.88596(57)      | 0.2352(18)       | 0.7594(36)       | 0.89242           | 0.22427           | 0.75062           |
| O2   | 0.7327(11)       | -0.02504(99)     | 0.7241(35)       | 0.71910           | 0.96793           | 0.70959           |
| O3   | 0.71428(88)      | 0.2971(11)       | 0.6017(15)       | 0.71895           | 0.28539           | 0.61102           |
| O4   | 0.85320(67)      | 0.4915(18)       | 0.2627(39)       | 0.85400           | 0.48447           | 0.26427           |
| O5   | 0.7368(11)       | 0.1965(10)       | 0.1054(14)       | 0.73213           | 0.18595           | 0.10628           |
| O6   | 0.64728(56)      | 0.4299(13)       | 0.2401(34)       | 0.65305           | 0.44132           | 0.22812           |
| N1   | 0.97066          | 0.65321          | 0.74714          | 0.95347           | 0.64963           | 0.76107           |
| N2   | 0.35925          | 0.21525          | 0.78115          | 0.36396           | 0.21732           | 0.78433           |
| C1   | 0.91678          | 0.79275          | 0.75301          | 0.90736           | 0.80264           | 0.77223           |
| C2   | 0.47298          | 0.22332          | 0.76300          | 0.47795           | 0.21978           | 0.74456           |
| H1   | 0.95155          | 0.58702          | 0.90357          | 0.92483           | 0.57119           | 0.93937           |
| H2   | 1.04020          | 0.70235          | 0.74309          | 0.03422           | 0.68777           | 0.76076           |
| H3   | 0.93740          | 0.86414          | 0.58428          | 0.93792           | 0.88802           | 0.58969           |
| H4   | 0.84178          | 0.73974          | 0.75738          | 0.82218           | 0.75077           | 0.76105           |
| H5   | 0.93603          | 0.86540          | 0.92119          | 0.92786           | 0.87466           | 0.97315           |
| H6   | 0.95282          | 0.58586          | 0.59123          | 0.92894           | 0.57647           | 0.57615           |
| H7   | 0.35280          | 0.32441          | 0.79270          | 0.35594           | 0.34450           | 0.78013           |
| H8   | 0.32903          | 0.15506          | 0.93662          | 0.33297           | 0.15831           | 0.97819           |
| H9   | 0.47994          | 0.10558          | 0.75054          | 0.48243           | 0.08397           | 0.74858           |
| H10  | 0.50558          | 0.28825          | 0.59530          | 0.50819           | 0.27969           | 0.53865           |
| H11  | 0.50688          | 0.28133          | 0.93143          | 0.52328           | 0.29656           | 0.91711           |
| H12  | 0.32782          | 0.16147          | 0.62499          | 0.32147           | 0.14346           | 0.61871           |

**Table S3.** Selected bond distances from PXRD,  $d_{\text{exp}}$ , and from quantum chemical calculations,  $d_{\text{calc}}$ .

| Atomic pair | Atomic distances in Å |                   | Atomic pair | Atomic distances in Å |                   |
|-------------|-----------------------|-------------------|-------------|-----------------------|-------------------|
|             | $d_{\text{exp}}$      | $d_{\text{calc}}$ |             | $d_{\text{exp}}$      | $d_{\text{calc}}$ |
| P1-O1       | 1.505(11)             | 1.490             | P1-O2       | 1.491(9)              | 1.505             |
| P1-O3       | 1.597(11)             | 1.641             | P1-O5       | 1.638(9)              | 1.636             |
| P2-O3       | 1.617(9)              | 1.619             | P2-O4       | 1.479(14)             | 1.508             |
| P2-O5       | 1.607(9)              | 1.637             | P2-O6       | 1.468(12)             | 1.491             |
| N1-C1       | 1.472                 | 1.499             | N2-C2       | 1.486                 | 1.506             |
| N1-H1       | 0.89                  | 1.04              | N2-H7       | 0.89                  | 1.04              |
| N1-H2       | 0.89                  | 1.02              | N2-H8       | 0.89                  | 1.04              |
| N1-H6       | 0.89                  | 1.04              | N2-H12      | 0.89                  | 1.04              |
| C1-H3       | 0.96                  | 1.09              | C2-H9       | 0.96                  | 1.09              |
| C1-H4       | 0.96                  | 1.09              | C2-H10      | 0.96                  | 1.09              |
| C1-H5       | 0.96                  | 1.09              | C2-H11      | 0.96                  | 1.09              |
| O2-H8       | 1.92                  | 1.78              | O2-H12      | 2.00                  | 1.77              |
| O4-H1       | 2.09                  | 1.79              | O4-H2       | 2.36                  | 1.27              |
| O4-H6       | 2.04                  | 1.81              | O6-H7       | 1.95                  | 1.73              |
| O6-H10      | 2.48                  | 2.42              | O6-H11      | 2.41                  | 2.31              |

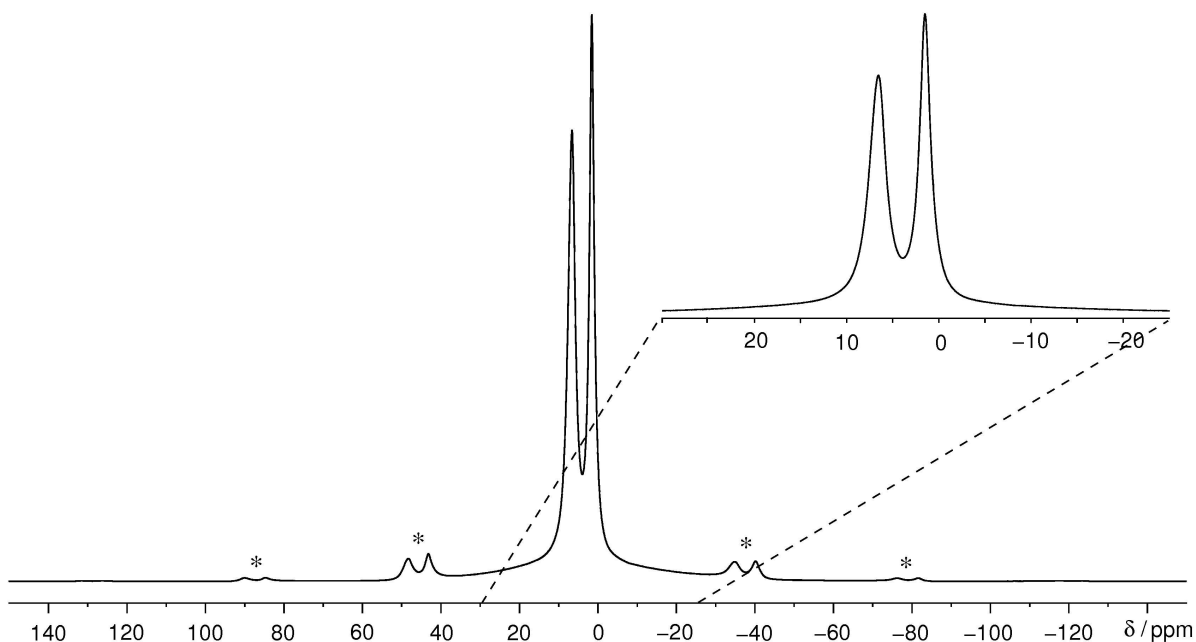**Figure S8.** Quantitative  $^1\text{H}$  MAS NMR spectrum of methylammonium catena-polyphosphate obtained at a sample spinning frequency of 25 kHz. The spectrum shows two signals corresponding to 2 different environments of hydrogen atoms, i.e. the H-atoms of the  $\text{CH}_3$  and  $\text{NH}_3$  functions, respectively. The signals appear at 6.6 (N-H) and 1.5 ppm (C-H) and show almost identical peak areas. The spectrum includes all rotational side-bands denoted with an asterisk.

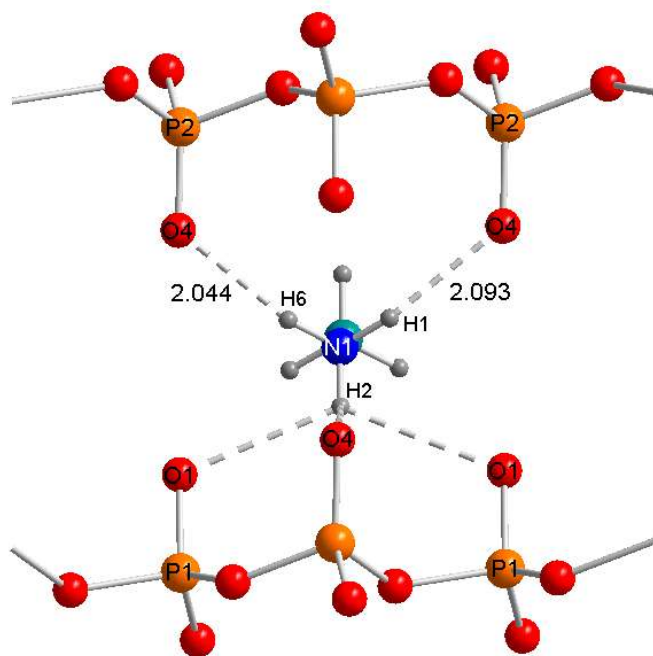

**Figure S9.** Graphical visualization of medium hydrogen bonds in Ångström achieved by powder XRD structure refinement.

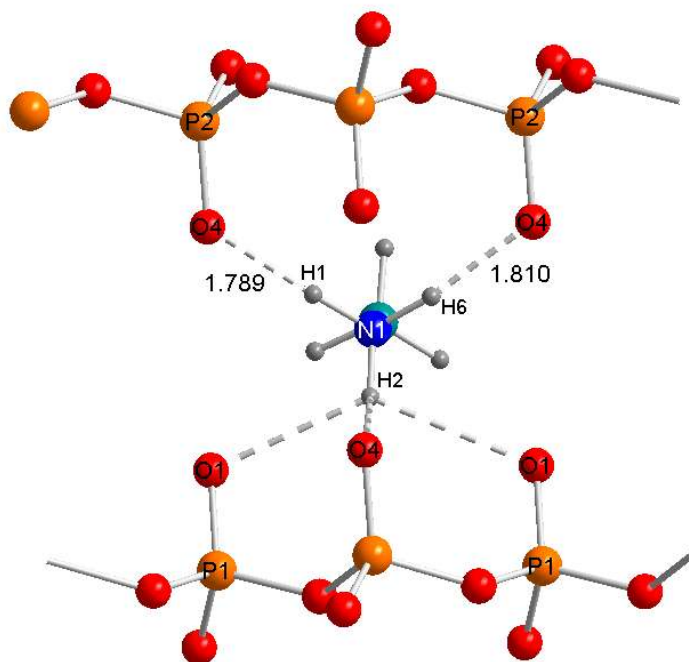

**Figure S10.** Graphical visualization of medium hydrogen bonds in Ångström achieved by quantum chemical calculations (PBE/VdW-DF).



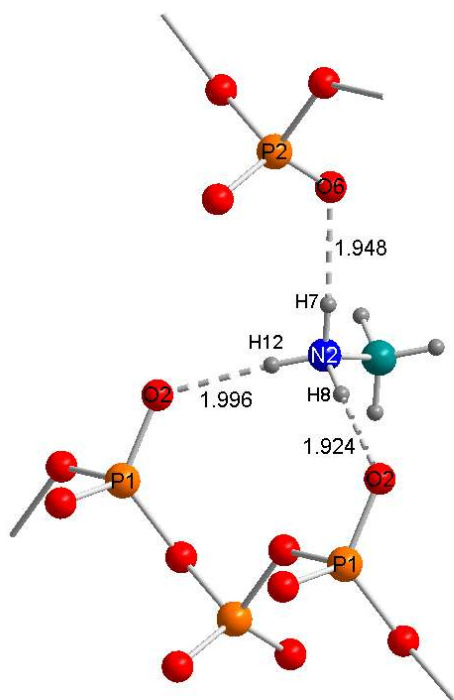

**Figure S11.** Graphical visualization of medium hydrogen bonds in Ångström achieved by powder XRD structure refinement.

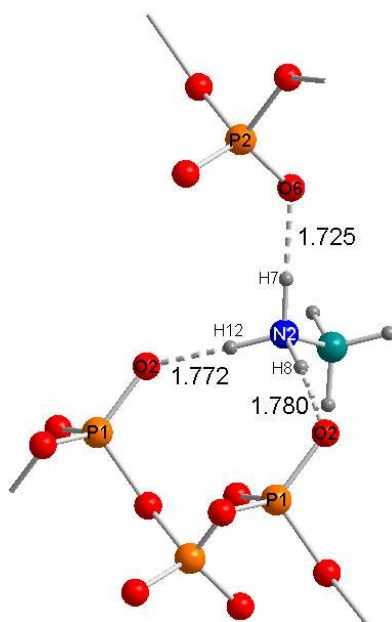

**Figure S12.** Graphical visualization of medium hydrogen bonds in Ångström achieved by quantum chemical calculations (PBE/VdW-DF).

**Table S4.** Relevant experimental bond distances  $d$  in Ångström and angles  $\omega$  in degree for hydrogen bonding.

| Atoms     | $d_{\text{exp}}(\text{N-O}) / \text{Å}$ | $d_{\text{exp}}(\text{N-H}) / \text{Å}$ | $d_{\text{exp}}(\text{O-H}) / \text{Å}$ | $\omega_{\text{exp}}(\text{N-H-O}) / ^\circ$ |
|-----------|-----------------------------------------|-----------------------------------------|-----------------------------------------|----------------------------------------------|
| N2-H7-O6  | 2.83(1)                                 | 0.89                                    | 1.95(1)                                 | 170.6(3)                                     |
| N2-H12-O2 | 2.88(1)                                 | 0.89                                    | 2.00(1)                                 | 174.1(3)                                     |
| N2-H8-O2  | 2.81(1)                                 | 0.89                                    | 1.92(1)                                 | 178.5(3)                                     |
| N1-H1-O4  | 2.92(2)                                 | 0.89                                    | 2.09(2)                                 | 153.5(4)                                     |
| N1-H6-O4  | 2.86(2)                                 | 0.89                                    | 2.04(2)                                 | 151.0(4)                                     |
| N1-H2-O1  | 2.99(1)                                 | 0.89                                    | 2.53(2)                                 | 112.7(2)                                     |
| N1-H2-O4  | 2.87(1)                                 | 0.89                                    | 2.36(1)                                 | 116.8(2)                                     |
| N1-H2-O1  | 2.95(1)                                 | 0.89                                    | 2.50(2)                                 | 111.9(2)                                     |

**Table S5.** Relevant theoretical bond distances  $d$  in Ångström and angles  $\omega$  in degree for hydrogen bonding (PBE/VdW-DF).

| Atoms     | $d_{\text{qalc}}(\text{N-O}) / \text{Å}$ | $d_{\text{qalc}}(\text{N-H}) / \text{Å}$ | $d_{\text{qalc}}(\text{O-H}) / \text{Å}$ | $\omega_{\text{qalc}}(\text{N-H-O}) / ^\circ$ |
|-----------|------------------------------------------|------------------------------------------|------------------------------------------|-----------------------------------------------|
| N2-H7-O6  | 2.77                                     | 1.04                                     | 1.73                                     | 178.2                                         |
| N2-H12-O2 | 2.79                                     | 1.04                                     | 1.77                                     | 165.4                                         |
| N2-H8-O2  | 2.81                                     | 1.04                                     | 1.78                                     | 172.9                                         |
| N1-H1-O4  | 2.80                                     | 1.04                                     | 1.79                                     | 162.6                                         |
| N1-H6-O4  | 2.81                                     | 1.04                                     | 1.81                                     | 161.8                                         |
| N1-H2-O1  | 3.07                                     | 1.02                                     | 2.51                                     | 113.5                                         |
| N1-H2-O4  | 3.02                                     | 1.02                                     | 2.27                                     | 128.6                                         |
| N1-H2-O1  | 3.06                                     | 1.02                                     | 2.57                                     | 109.4                                         |
